# Supplementary material for: Vitamin C enhances the expression of IL17 in a Jmjd2–dependent manner
Source: PubMed Central journal article supplement — BMB Rep. 2017 Jan 31;50(1):49–54. doi: 10.5483/BMBRep.2017.50.1.193 (PMC5319665; doi:10.5483/bmbrep.2017.50.1.193), 2017-01-31

1 **Supplementary Information for**

2

3 Vitamin C enhances the expression of IL17 in a Jmjd2–dependent manner

4

5 Mi Hye Song, Varun Sasidharan Nair, Kwon Ik Oh\*

6

7 Department of Pathology, Hallym University College of Medicine, Chuncheon, Gangwon-Do,

8 200-702, Korea

9

10 \* Corresponding Author: Kwon Ik Oh, kwonik@hallym.ac.kr

1 **Supplementary Figure Legends**

2

3 **Supplementary Fig. 1.** Vitamin C upregulates Foxp3 under Th17 polarizing conditions.

4 FACS-sorted WT naïve CD4<sup>+</sup> T cells were cultured under Th17 condition in the presence or  
5 absence of vitamin C (10 µg/ml). Foxp3 expression was analyzed by FACS.

6 Foxp3<sup>+</sup> cells were re-sorted and subjected to bisulfite sequencing to analyze the methylation  
7 pattern of the Foxp3 enhancer. Methylation status of individual 12 CpG motifs was shown by  
8 white (demethylation) or black (methylation) circles (right).

9

10 **Supplementary Fig. 2.**

11 (A) IL17 expression in Th17 cells generated in the presence of vitamin C, glutathione (GSH),  
12 or dithiothreitol (DTT).

13 (B) IL17 expression in Th17 cells generated in the presence of vitamin C alone or vitamin C  
14 plus various doses of NOG.

# Supplementary Fig 1

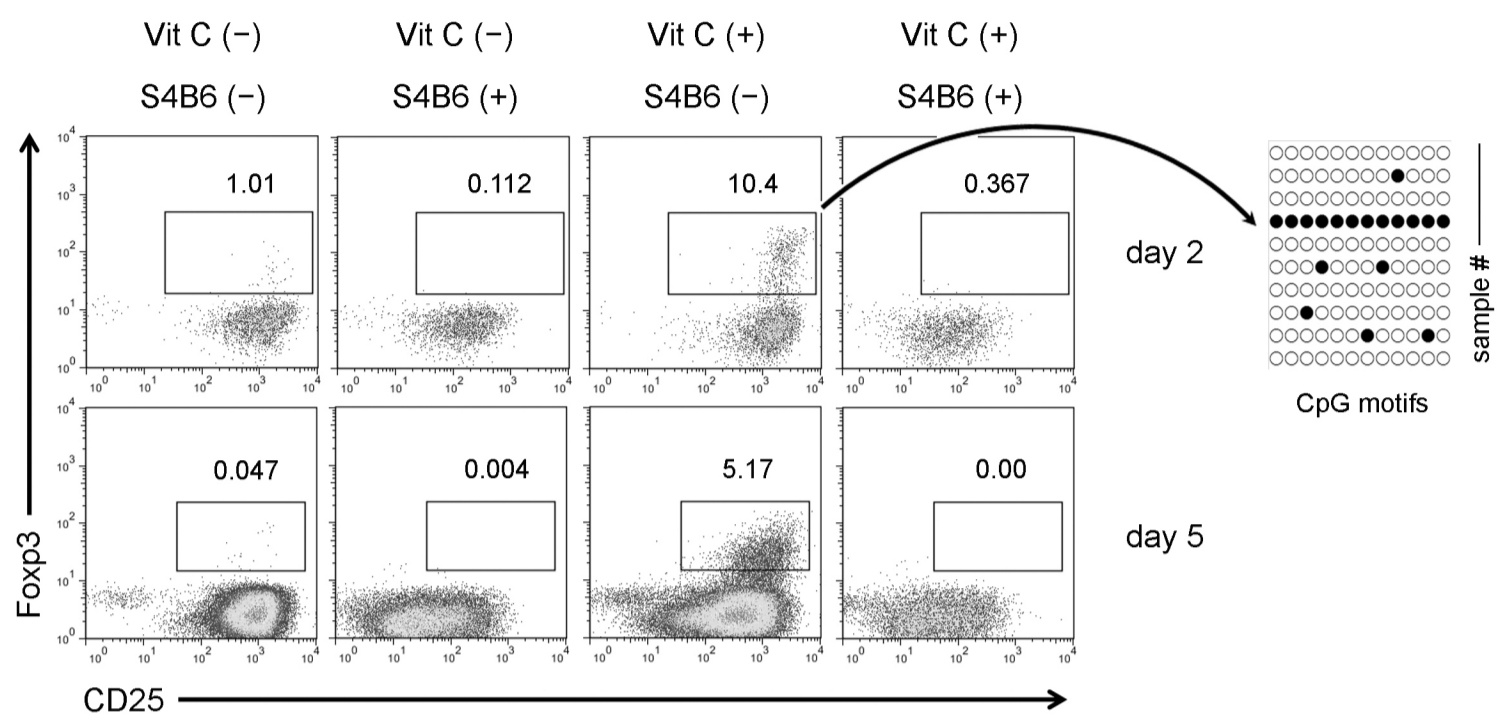

# Supplementary Fig 2

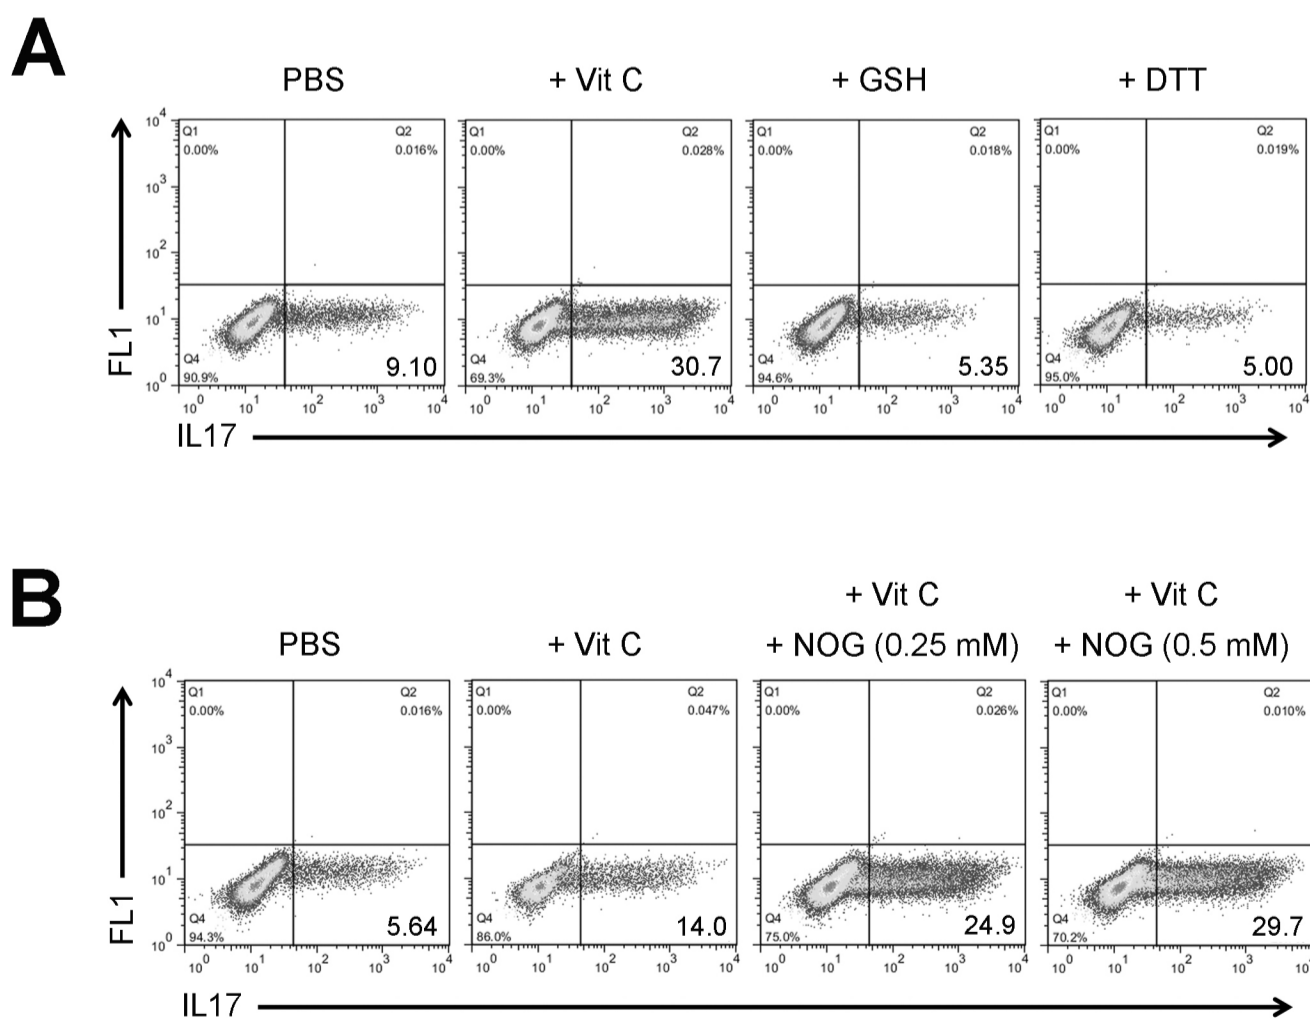

Supplement: bmb-50-049_suppl.pdf [file bmb-50-049_suppl.pdf]
